# Supplementary material for: Behavioral Health Factors as Predictors of Emergency Department Use in the High-Risk, High-Cost Medicare Population
Source: Atypon-hosted journal article supplement (doi:10.1176/appi.ps.201800083), 2018-09-26
Supplement: appi.ps.201800083.ds001.pdf [file appi.ps.201800083.ds001.pdf]

## Appendix A1

We categorized behavioral health ICD-9-CM diagnosis codes into eleven mutually exclusive categories: Adjustment, Affective, Anxiety, Axis II, Eating, Neuropsychiatric, Psychosis, Sleep, Substance Abuse, Other and Unknown. Here, we list the ICD-9-CM diagnosis codes used to determine if a patient met the criteria for each of the eleven behavioral health conditions.

**Adjustment:** 308, 308.2, 308.3, 308.4, 308.9, 309, 309.1, 309.24, 309.28, 309.29, 309.3, 309.4, 309.83, 309.89, 309.9

**Affective:** 296, 296.03, 296.04, 296.05, 296.1, 296.11, 296.2, 296.21, 296.22, 296.23, 296.24, 296.3, 296.31, 296.32, 296.33, 296.34, 296.35, 296.4, 296.42, 296.43, 296.53, 296.6, 296.61, 296.7, 296.8, 296.9, 300.4, 300.5, 311, E939.0

**Anxiety:** 300, 300.01, 300.02, 300.09, 300.2, 300.29, 300.3, 309.21, 309.81, 799.21

**Axis II:** 300.1, 300.11, 300.14, 300.15, 300.19, 301, 301.12, 301.2, 301.3, 301.4, 301.6, 301.7, 301.81, 301.83, 301.89, 301.9

**Eating:** 307.1, 307.5, 307.51, 307.59

**Neuropsychiatric:** 290.1, 290.11, 290.12, 290.13, 290.2, 290.21, 290.3, 290.4, 290.41, 290.42, 290.43, 292.81, 293, 293.1, 293.83, 293.84, 293.89, 293.9, 294, 294.1, 294.11, 294.8, 294.9, 299, 308.1, 310, 310.1, 310.2, 310.8, 310.9, 314, 314.01, 315.1, 315.31, 315.8, 315.9, 317, 319, 327.2, 327.23, 327.24, 331, 331.19, 331.82, 331.83, 331.9, V40.0

**Psychosis:** 290.9, 293.81, 295, 295.01, 295.1, 295.11, 295.2, 295.3, 295.31, 295.33, 295.6, 295.61, 295.62, 295.64, 295.7, 295.72, 295.74, 295.9, 295.91, 297.1, 297.8, 297.9, 298.3, 298.4, 298.8, 298.9, 299.1, 299.8, 780.1

**Sleep:** 307.4, 307.41, 307.42, 307.43, 307.46, 307.47, 307.49, 327, 327.01, 327.02, 327.3, 327.31, 327.42, 327.51, 327.52, 327.53, 780.5, 780.51, 780.52, 780.53, 780.54, 780.57, 780.59

**Substance Abuse:** 291, 291.1, 291.2, 291.81, 291.89, 291.9, 292, 292.11, 292.12, 292.2, 292.84, 293.82, 303, 303.01, 303.02, 303.9, 303.91, 303.93, 304, 304.01, 304.1, 304.11, 304.2, 304.5, 304.6, 304.7, 304.8, 304.83, 304.9, 304.93, 305, 305.01, 305.02, 305.03, 305.1, 305.5, 535.3, 571.1, 571.2, 571.3, 965, 965.02, 965.09, E854.2, E935.0, E935.1, V11.3

**Other:** 300.7, 300.81, 300.82, 300.9, 302.7, 302.71, 302.72, 302.74, 302.79, 302.83, 302.9, 306.5, 306.9, 307.8, 307.89, 312, 312.3, 312.89, 312.9, 316, 368.16, 799.25, 967.8, 970.8, E939.2, E939.3, E939.8, V65.2

**Unknown:** 292.9, 298.2, 306.1, 306.8, 783.7, 799.29, 969, 969.4, 980, 995.81, 995.83, 995.84, E950.0, E950.4, E953.0, E956, E958.9, E959, E987.2, V11.8, V40.3, V62.84, V62.9, V66.3, V69.2, V70.2, V71.9

## **Appendix A2**

We categorized psychotropic medications into seven mutually exclusive categories: Anxiety, Cognitive, Mood, Psychosis, Sleep and Substance Abuse. Here, we list the generic drug names followed by brand name in parentheses for each category.

### **Anxiety**

Alprazolam (Xanax)  
Buspirone (Buspar)  
Chlordiazepoxide (Librium)  
Clonazepam (Klonopin)  
Clonidine (Catapres)  
Clorazepate (Tranxene)  
Diazepam (Valium)  
Gabapentin (Neurontin)  
Lorazepam (Ativan)  
Meprobamate (Equanil)  
Oxazepam (Serax)  
Propranolol (Inderal)

### **Cognitive**

Amantadine (Symmetrel)  
Amphetamine and Dextroamphetamine (Adderall)  
Armodafinil (Nuvigil)  
Atomoxetine (Strattera)  
Dexmethylphenidate (Focalin)  
Dextroamphetamine (Dexedrine)  
Donepezil (Aricept)  
Methylphenidate (Ritalin)  
Modafinil (Provigil)

### **Mood**

Amitriptyline (Elavil)  
Amitriptyline and Perphenazine (Triavil)  
Bupropion (Wellbutrin, Zyban)  
Carbamazepine (Tegretol)  
Citalopram (Celexa)  
Clomipramine (Anafranil)  
Desipramine (Norpramin)  
Divalproex, Valproic Acid (Depakote)  
Doxepin (Sinequan)  
Duloxetine (Cymbalta)  
Escitalopram (Lexapro)  
Fluoxetine (Prozac)

Fluvoxamine (Luvox)  
Imipramine (Tofranil)  
Lamotrigine (Lamictal)  
Lithium (Eskalith)  
L-methylfolate (Deplin)  
Mirtazapine (Remeron)  
Nefazodone (Serzone)  
Nortriptyline (Pamelor)  
Oxcarbazepine (Trileptal)  
Paroxetine (Paxil)  
Phenelzine (Nardil)  
Protriptyline (Vivactil)  
Selegiline (Emsam)  
Sertraline (Zoloft)  
Tranlycypromine (Parnate)  
Trazodone (Desyrel)  
Venlafaxine (Effexor)  
Zonisamide (Zonegran)

### **Psychosis**

Aripiprazole (Abilify)  
Benztropine (Cogentin)  
Chlorpromazine (Thorazine)  
Clozapine (Clozaril)  
Fluphenazine (Prolixin)  
Haloperidol (Haldol)  
Loxapine (Loxitane)  
Molindone (Moban)  
Olanzapine (Zydis, Zyprexa)  
Paliperidone (Invega)  
Perphenazine (Trilafon)  
Prochlorperazine (Compazine)  
Quetiapine (Seroquel)  
Risperidone (Risperdal)  
Thioridazine (Mellaril)  
Thiothixene (Navane)  
Trifluoperazine (Trifluoperaz)  
Trihexyphenidyl (Artane)  
Ziprasidone (Geodon)

### **Sleep**

Chloral Hydrate (Aquachloral)  
Estazolam (Prosom)  
Eszopiclone (Lunesta)

Flurazepam (Dalmane)  
Melatonin (Melatonin)  
Ramelteon (Rozerem)  
Temazepam (Restoril)  
Triazolam (Halcion)  
Zaleplon (Sonata)  
Zolpidem (Ambien)

**Substance Abuse**

Acamprosate (Campral)  
Buprenorphine (Suboxone)  
Disulfiram (Antabuse)  
Methadone (Dolophine)  
Naloxone (Narcan)  
Naltrexone (Revia)  
Varenicline (Chantix)

**Appendix Exhibit A3. Type 3 Analysis of Effects, any ED visit**

| Effect                                              | DF | Wald ChiSq | Pr > ChiSq |
|-----------------------------------------------------|----|------------|------------|
| Male                                                | 1  | 1.83       | .176       |
| Age group                                           | 4  | 3.29       | .511       |
| Post-study survival                                 | 5  | 69.71      | <.001      |
| Hierarchical Condition Category (HCC) Group         | 3  | 23.21      | <.001      |
| Year of enrollment                                  | 3  | 1.98       | .576       |
| Number of current psychiatric medication categories | 2  | 53.79      | <.001      |
| Number of current psychiatric diagnosis categories  | 2  | 38.80      | <.001      |

**Appendix Exhibit A4. Analysis of Variance Maximum Likelihood Estimates Logistic: any ED visit**

| Parameter                                           | Estimate | Standard Error | Wald ChiSq | P>ChiSq |
|-----------------------------------------------------|----------|----------------|------------|---------|
| Intercept                                           | -1.689   | .182           |            | <.001   |
| Male                                                | -.099    | .073           | 1.83       | .176    |
| Age group, years                                    |          |                |            |         |
| 60s                                                 | .024     | .153           | .02        | .877    |
| 70s                                                 | -.080    | .139           | .34        | .562    |
| 80s                                                 | -.108    | .142           | .58        | .446    |
| 90+                                                 | .124     | .198           | .39        | .532    |
| Post-study survival, months                         |          |                |            |         |
| 0 (death during last month of enrollment)           | 1.398    | .431           | 10.51      | .001    |
| 1-3                                                 | 1.291    | .243           | 28.28      | <.001   |
| 4-12                                                | .863     | .146           | 6.33       | .012    |
| 13-24                                               | .373     | .148           | 7.05       | .008    |
| 25-44                                               | .341     | .128           | 34.95      | <.001   |
| Hierarchical Condition Category (HCC) Group         |          |                |            |         |
| [2.3,2.7)                                           | .140     | .104           | 1.80       | .179    |
| [2.7,3.4)                                           | .212     | .103           | 4.23       | .040    |
| [3.4,12.7)                                          | .472     | .101           | 21.67      | <.001   |
| Year of enrollment                                  |          |                |            |         |
| 2008                                                | -.383    | .339           | 1.27       | .259    |
| 2009                                                | .010     | .101           | .01        | .919    |
| 2010                                                | .086     | .112           | 0.60       | .439    |
| Number of current psychiatric medication categories |          |                |            |         |
| 1                                                   | .459     | .121           | 14.31      | <.001   |
| ≥2                                                  | .795     | .111           | 51.19      | <.001   |
| Number of current psychiatric diagnosis categories  |          |                |            |         |
| 1                                                   | .191     | .101           | 3.58       | .059    |
| ≥2                                                  | .559     | .095           | 35.00      | <.001   |

**Appendix Exhibit A5. Type 3 Analysis of Effects, count of ED visits**

| Source                                              | DF | ChiSq | Pr > ChiSq |
|-----------------------------------------------------|----|-------|------------|
| Male                                                | 1  | .34   | .560       |
| Age group, years                                    | 4  | 6.31  | .177       |
| Post-study survival, months                         | 5  | 27.54 | <.001      |
| Hierarchical Condition Category (HCC) Group         | 3  | 1.79  | .618       |
| Year of enrollment                                  | 3  | 3.34  | .342       |
| Number of current psychiatric medication categories | 2  | 17.56 | <.001      |
| Number of current psychiatric diagnosis categories  | 2  | 16.61 | <.001      |

**Appendix Exhibit A6. Analysis of Variance Maximum Likelihood Estimates, count of ED visits**

| Parameter                                           | Estimate | Standard Error | Wald ChiSq | Pr > ChiSq |
|-----------------------------------------------------|----------|----------------|------------|------------|
| Intercept                                           | .311     | .107           | 8.47       | .004       |
| Male                                                | .024     | .041           | .34        | .560       |
| Age group, years                                    |          |                |            |            |
| 60s                                                 | -.103    | .078           | 1.78       | .182       |
| 70s                                                 | -.173    | .071           | 5.95       | .015       |
| 80s                                                 | -.128    | .072           | 3.17       | .075       |
| 90+                                                 | -.172    | .100           | 2.94       | .086       |
| Post-study survival, months                         |          |                |            |            |
| 0 (death during last month of enrollment)           | .085     | .186           | .21        | .648       |
| 1-3                                                 | .384     | .089           | 18.78      | <.001      |
| 4-12                                                | .249     | .067           | 1.48       | .224       |
| 13-24                                               | .094     | .077           | .16        | .690       |
| 25-44                                               | .028     | .070           | 14.02      | <.001      |
| Hierarchical Condition Category (HCC) Group         |          |                |            |            |
| [2.3,2.7)                                           | .026     | .061           | .19        | .667       |
| [2.7,3.4)                                           | -.024    | .061           | .15        | .697       |
| [3.4,12.7)                                          | .044     | .057           | .61        | .437       |
| Year of enrollment                                  |          |                |            |            |
| 2008                                                | -.209    | .231           | .82        | .367       |
| 2009                                                | .075     | .055           | 1.88       | .171       |
| 2010                                                | .061     | .063           | .92        | .337       |
| Number of current psychiatric medication categories |          |                |            |            |
| 1                                                   | .173     | .083           | 4.34       | .037       |
| ≥2                                                  | .290     | .075           | 14.84      | <.001      |
| Number of current psychiatric diagnosis categories  |          |                |            |            |
| 1                                                   | .078     | .063           | 1.52       | .217       |
| ≥2                                                  | .210     | .057           | 13.75      | <.001      |

**Appendix Exhibit A7. Type 3 Analysis of Effects, any ED visit**

| Effect                                              | DF | Wald Chi-Sq | Pr > ChiSq |
|-----------------------------------------------------|----|-------------|------------|
| Male                                                | 1  | 2.51        | .113       |
| Age group                                           | 4  | 3.26        | .515       |
| Post-study survival                                 | 5  | 63.84       | <.001      |
| Hierarchical Condition Category (HCC) Group         | 3  | 20.12       | <.001      |
| Year of enrollment                                  | 3  | 2.57        | .463       |
| Number of current psychiatric medication categories | 2  | 53.85       | <.001      |
| Adjustment                                          | 1  | 5.46        | .019       |
| Affective                                           | 1  | .07         | .794       |
| Anxiety                                             | 1  | 1.81        | .179       |
| Axis II                                             | 1  | 1.22        | .270       |
| Eating                                              | 1  | .01         | .925       |
| Neuropsychiatric                                    | 1  | 4.60        | .032       |
| Other                                               | 1  | 2.29        | .131       |
| Psychosis                                           | 1  | 9.55        | .002       |
| Sleep                                               | 1  | 4.61        | .032       |
| Substance Abuse                                     | 1  | 2.69        | .101       |
| Unknown                                             | 1  | 20.70       | <.001      |

**Appendix Exhibit A8. Analysis of Variance Maximum Likelihood Estimates, any ED visit**

| Parameter                                   | Estimate | Standard Error | Wald ChiSq | P>ChiSq |
|---------------------------------------------|----------|----------------|------------|---------|
| Intercept                                   | -1.698   | .182           | 86.93      | <.001   |
| Male                                        | -.117    | .074           | 2.51       | .113    |
| Age group, years                            |          |                |            |         |
| 60s                                         | .101     | .157           | .42        | .519    |
| 70s                                         | -.016    | .144           | .01        | .914    |
| 80s                                         | -.062    | .148           | .18        | .676    |
| 90+                                         | .150     | .203           | .54        | .461    |
| Post-study survival, months                 |          |                |            |         |
| 0 (death during last month of enrollment)   | 1.387    | .433           | 10.27      | .001    |
| 1-3                                         | 1.273    | .244           | 27.13      | <.001   |
| 4-12                                        | .828     | .147           | 4.97       | .026    |
| 13-24                                       | .335     | .150           | 5.06       | .024    |
| 25-44                                       | .294     | .131           | 31.64      | <.001   |
| Hierarchical Condition Category (HCC) Group |          |                |            |         |
| [2.3,2.7)                                   | .128     | .105           | 1.49       | .223    |
| [2.7,3.4)                                   | .199     | .104           | 3.68       | .055    |
| [3.4,12.7)                                  | .442     | .102           | 18.71      | <.001   |
| Year of enrollment                          |          |                |            |         |
| 2008                                        | -.469    | .345           | 1.84       | .175    |
| 2009                                        | .011     | .102           | .01        | .916    |

|                                                     |       |      |       |       |
|-----------------------------------------------------|-------|------|-------|-------|
| 2010                                                | .087  | .113 | .59   | .441  |
| Number of current psychiatric medication categories |       |      |       |       |
| 1                                                   | .468  | .121 | 14.98 | <.001 |
| ≥2                                                  | .798  | .111 | 51.85 | <.001 |
| Current psychiatric diagnosis categories            |       |      |       |       |
| Adjustment                                          | .236  | .101 | 5.46  | .019  |
| Affective                                           | .024  | .094 | .07   | .794  |
| Anxiety                                             | -.135 | .101 | 1.81  | .179  |
| Axis II                                             | .302  | .274 | 1.22  | .270  |
| Eating                                              | .042  | .445 | .01   | .925  |
| Neuropsychiatric                                    | .172  | .080 | 4.60  | .032  |
| Other                                               | .261  | .173 | 2.29  | .131  |
| Psychosis                                           | .349  | .113 | 9.55  | .002  |
| Sleep                                               | .200  | .093 | 4.61  | .032  |
| Substance Abuse                                     | .198  | .121 | 2.69  | .101  |
| Unknown                                             | .415  | .091 | 20.70 | <.001 |



**Appendix Exhibit A9. Type 3 Analysis of Effects, any ED visit**

| Source                                              | DF | Chi-Square | Pr > ChiSq |
|-----------------------------------------------------|----|------------|------------|
| Male                                                | 1  | .16        | .686       |
| Age group                                           | 4  | 4.05       | .399       |
| Post-study survival                                 | 5  | 26.41      | <.001      |
| Hierarchical Condition Category (HCC) Group         | 3  | 1.90       | .594       |
| Year of enrollment                                  | 3  | 3.72       | .293       |
| Number of current psychiatric medication categories | 2  | 16.78      | <.001      |
| Adjustment                                          | 1  | .01        | .937       |
| Affective                                           | 1  | .01        | .926       |
| Anxiety                                             | 1  | .30        | .581       |
| Axis II                                             | 1  | 4.73       | .030       |
| Eating                                              | 1  | 2.20       | .138       |
| Neuropsychiatric                                    | 1  | 6.63       | .010       |
| Other                                               | 1  | 8.50       | .004       |
| Psychosis                                           | 1  | .18        | .671       |
| Sleep                                               | 1  | .28        | .599       |
| Substance Abuse                                     | 1  | 11.96      | .001       |
| Unknown                                             | 1  | 2.94       | .086       |

**Appendix Exhibit A10. Analysis of Variance Maximum Likelihood Estimates, count of ED visits**

| Parameter                                   | Estimate | Standard Error | Wald ChiSq | Pr > ChiSq |
|---------------------------------------------|----------|----------------|------------|------------|
| Intercept                                   | .286     | .105           |            |            |
| Male                                        | .017     | .041           | .16        | .686       |
| Age group, years                            |          |                |            |            |
| 60s                                         | -.061    | .079           | .59        | .444       |
| 70s                                         | -.133    | .073           | 3.32       | .068       |
| 80s                                         | -.073    | .074           | .96        | .327       |
| 90+                                         | -.104    | .103           | 1.02       | .313       |
| Post-study survival, months                 |          |                |            |            |
| 0 (death during last month of enrollment)   | .092     | .187           | .24        | .622       |
| 1-3                                         | .382     | .089           | 18.3       | <.001      |
| 4-12                                        | .234     | .067           | 1.44       | .230       |
| 13-24                                       | .094     | .078           | .01        | .942       |
| 25-44                                       | .005     | .071           | 12.21      | <.001      |
| Hierarchical Condition Category (HCC) Group |          |                |            |            |
| [2.3,2.7)                                   | .021     | .061           | .12        | .730       |
| [2.7,3.4)                                   | -.033    | .061           | .30        | .583       |
| [3.4,12.7)                                  | .038     | .057           | .45        | .503       |
| Year of enrollment                          |          |                |            |            |
| 2008                                        | -.235    | .232           | 1.03       | .310       |

|                                                     |       |      |       |       |
|-----------------------------------------------------|-------|------|-------|-------|
| 2009                                                | .085  | .056 | 2.35  | .125  |
| 2010                                                | .040  | .064 | .40   | .530  |
| Number of current psychiatric medication categories |       |      |       |       |
| 1                                                   | .183  | .083 | 4.89  | .027  |
| ≥2                                                  | .288  | .075 | 14.74 | <.001 |
| Current psychiatric diagnosis categories            |       |      |       |       |
| Adjustment                                          | .004  | .052 | .01   | .937  |
| Affective                                           | -.005 | .048 | .01   | .926  |
| Anxiety                                             | .029  | .052 | .31   | .580  |
| Axis II                                             | .244  | .109 | 5.03  | .025  |
| Eating                                              | -.344 | .244 | 1.99  | .159  |
| Neuropsychiatric                                    | .108  | .042 | 6.65  | .010  |
| Other                                               | .228  | .076 | 8.98  | .003  |
| Psychosis                                           | .023  | .054 | .18   | .670  |
| Sleep                                               | .025  | .048 | .28   | .598  |
| Substance Abuse                                     | .204  | .058 | 12.48 | <.001 |
| Unknown                                             | .077  | .045 | 2.96  | .085  |
